# Supplementary material
Source: MDPI journal article supplement (https://www.mdpi.com/2035-8148/13/2/6)

**Table S1.** Laboratory characteristics of patients and drug therapy

| Parameters                    | MIOCA<br>n = 155 | MINOCA<br>n= 114 | p     |
|-------------------------------|------------------|------------------|-------|
| Laboratory data               |                  |                  |       |
| Hemoglobin level, g/L         | 146 (134;155)    | 146 (135;155)    | 0.733 |
| Platelets, 10 <sup>9</sup> /l | 254 (215;300)    | 249 (212;286)    | 0.789 |
| Cholesterol total             | 4.3 (4.5;5.8)    | 4.4 (3.6;6.2)    | 0.557 |
| Creatinine, mkmol/l           | 82 (75;91)       | 81.5 (75;93)     | 0.702 |
| Triglycerides, mmol/l         | 1.65 (1;2.3)     | 1.4(0.9;2.4)     | 0.307 |
| Glucose, mmol/l               | 5.9 (5.2;7.1)    | 5.95 (5.2;7.2)   | 0.945 |
| Drug therapy                  |                  |                  |       |
| Acetylsalicylic acid, %       | 57.4             | 58.8             | 0.824 |
| Other antiaggregant           | 29               | 28.9             | 0.987 |
| Nitrates, %                   | 8.4              | 7                | 0.679 |
| ACE inhibitors, %             | 37.4             | 36.8             | 0.923 |
| ARA, %                        | 8.4              | 9.6              | 0.720 |
| Beta-blockers, %              | 55.5             | 52.6             | 0.643 |
| Calcium antagonists, %        | 5.8              | 6.1              | 0.909 |
| Statins, %                    | 54.2             | 53.5             | 0.911 |
| Other lipid-lowering drugs    | 11               | 10.5             | 0.908 |

ACE – angiotensin-converting enzyme; ARA – angiotensin receptor antagonist.

**Figure S1.** Kaplan–Meier survival and freedom from mortality.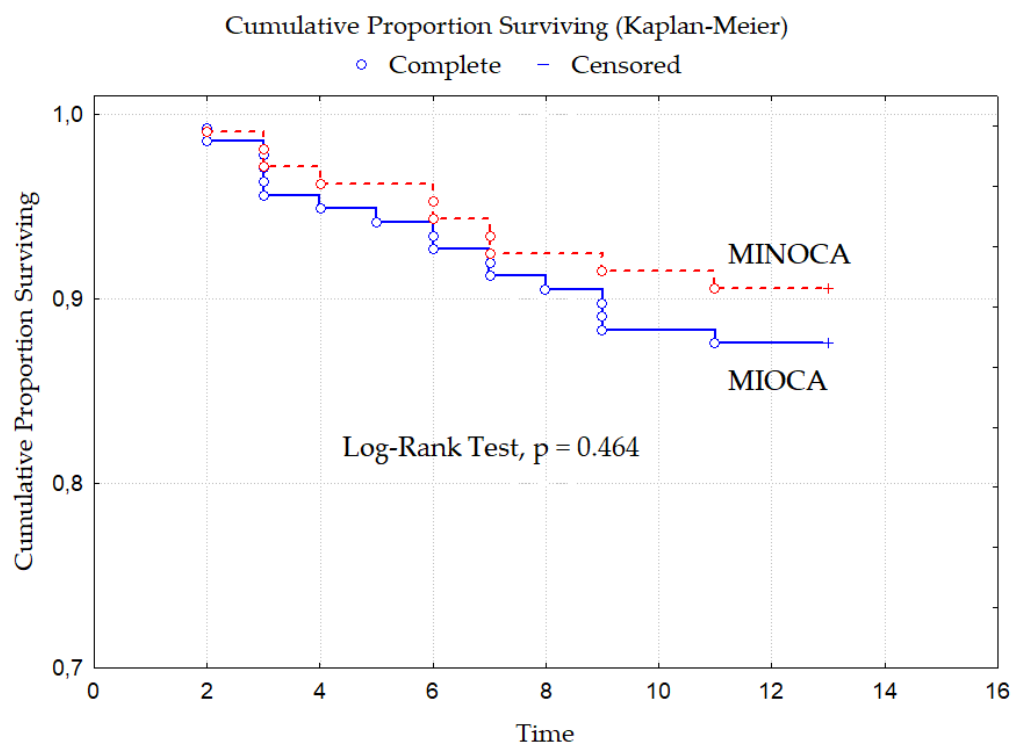

Figure S2. Kaplan–Meier survival and freedom from MI.

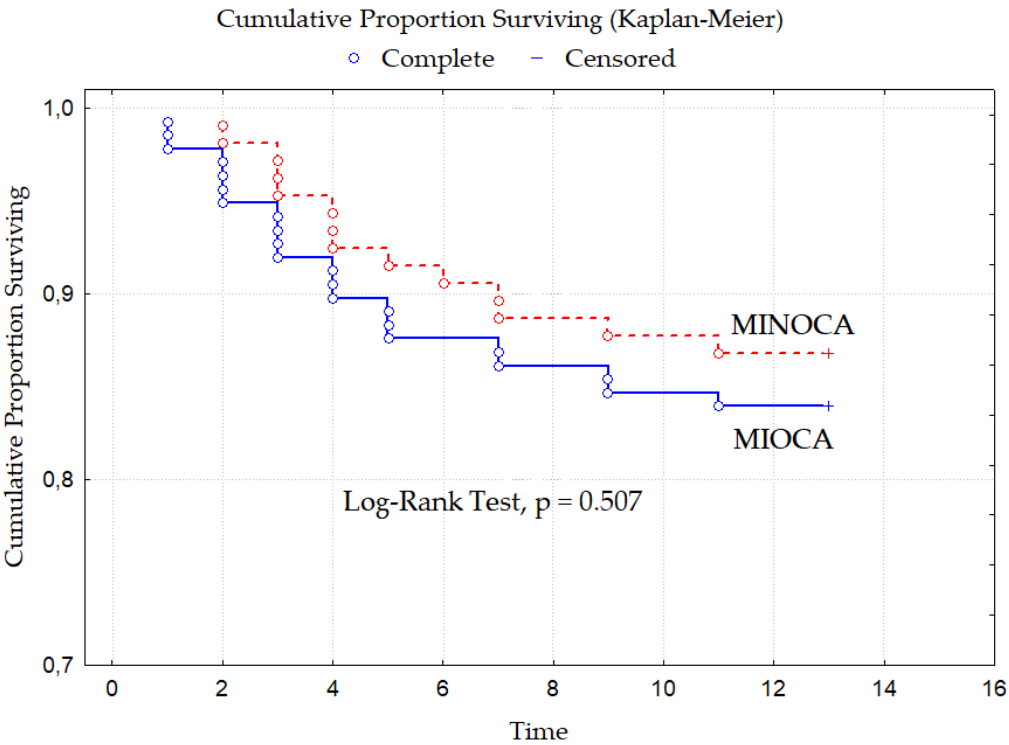

Figure S3. Kaplan–Meier survival and freedom from acute cerebrovascular incident/stroke.

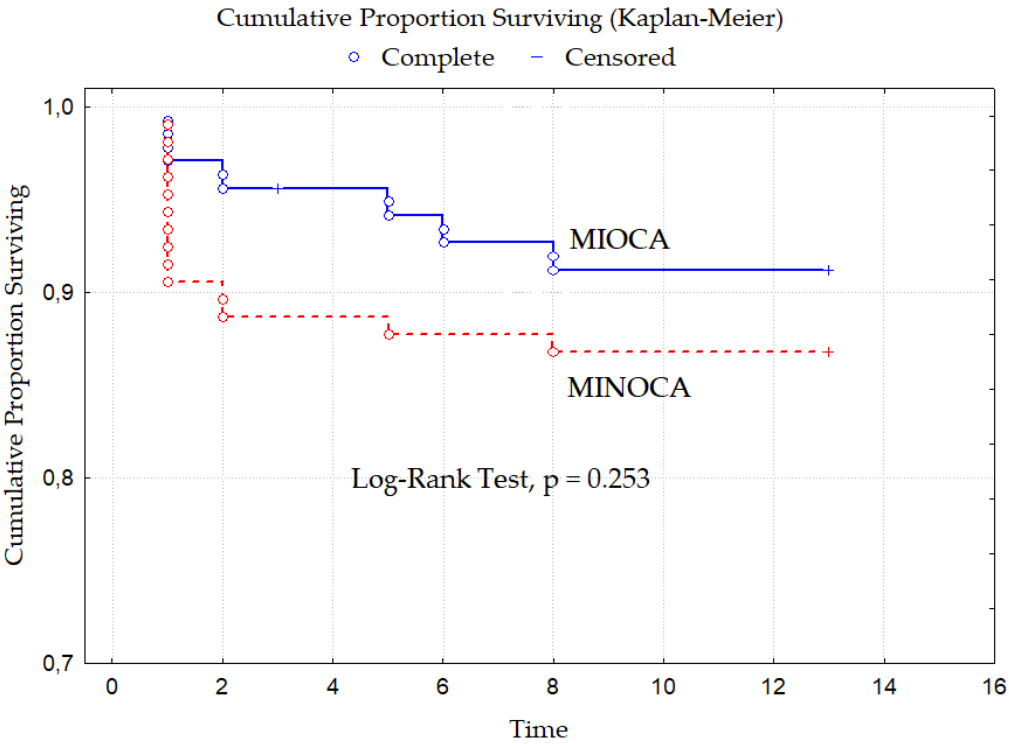

**Figure S4.** Kaplan–Meier survival and freedom from hospitalization.

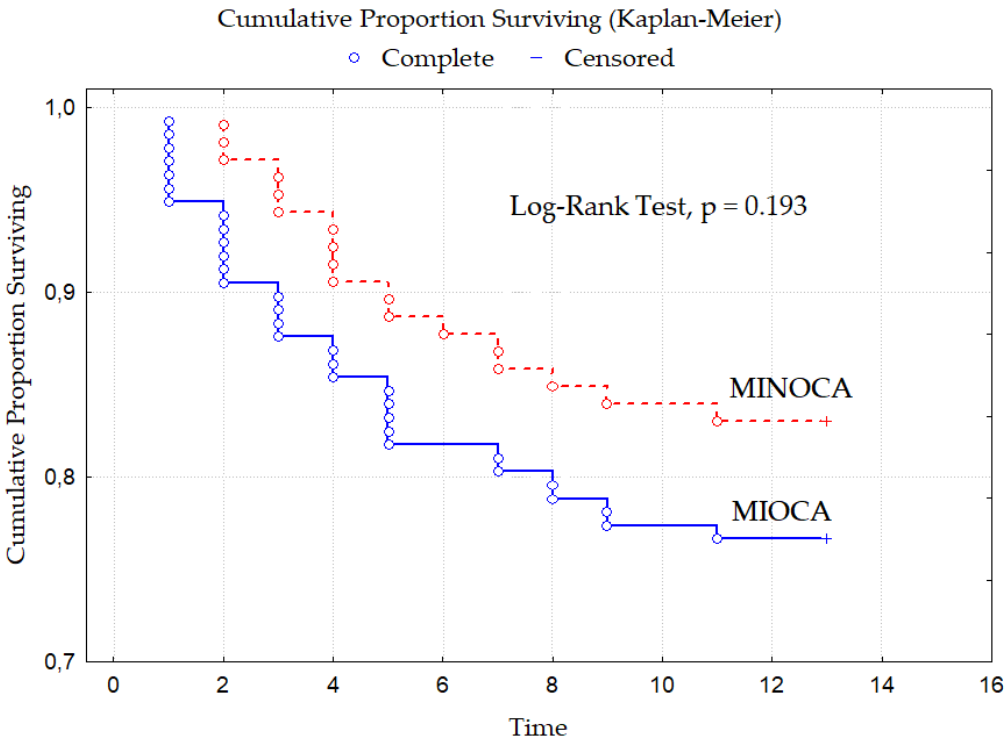

Supplement: s1 [file s1]
